# Supplementary material for: Probing the surface structure of hydroxyapatite through its interaction with hydroxyl: a first-principles study
Source: Royal Society of Chemistry journal article supplement (doi:10.1039/c7ra13121f), 2018-01-01
Supplement: c7ra13121f1.pdf [file c7ra13121f1.pdf]

**Supplementary information**

**for**

**Probing the surface structure of hydroxyapatite through its  
interaction with hydroxyl: A first-principles study**

Xian Wang, Li Zhang, Zeyu Liu, Qun Zeng, Gang Jiang and Mingli Yang\*

Institute of Atomic and Molecular Physics, Sichuan University, Chengdu 610065, China

---

\* Corresponding author. Tel.: + 86-28-85405515; fax: + 86-28-85405515; E-mail address:  
myang@scu.edu.cn (Mingli Yang)

## Contents

**Fig. S1 Interaction patterns of hydroxyls (F1A, F1B and F1C), water molecule (W1), hydroxyl and water (W1A and W1B) on the Ca-rich (100) facet of HAp**

**Fig. S2 Interaction patterns of hydroxyls (F4A, F4B and F4C), water molecule (W4), hydroxyl and water (W4A and W4B) on the Ca-rich (010) facet of HAp**

**Fig. S3 Surface structures of pure HAp. SF1, SF2 and SF3 are Ca-rich, PO4-rich and Ca-PO4-OH surfaces on the (100) facet, respectively. SF4, SF5 and SF6 are Ca-rich, PO4-rich and Ca-PO4-OH surfaces on the (010) facet, respectively. SF7, SF8 and SF9 are Ca-rich, PO4-rich and Ca-PO4-OH surfaces on the (001) facet, respectively**

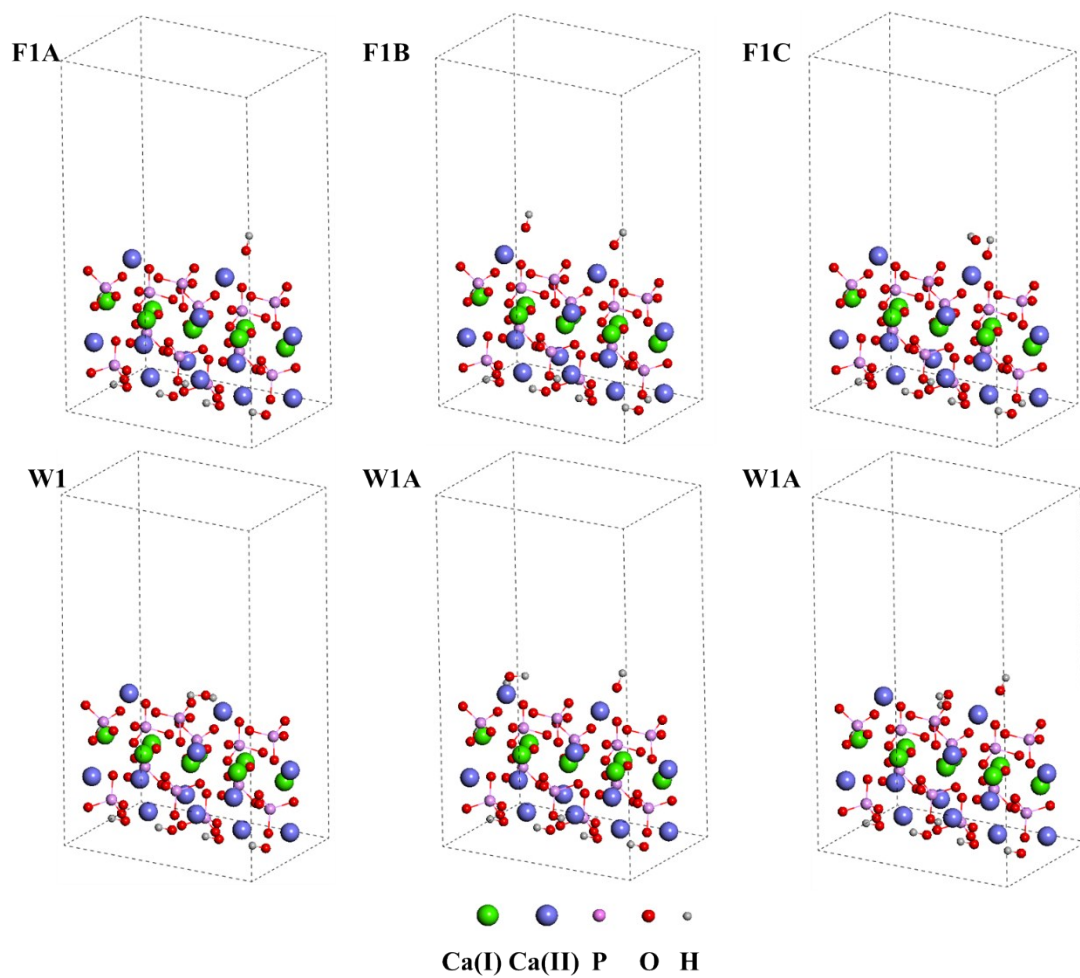

**Fig. S1** Interaction patterns of hydroxyls (F1A, F1B and F1C), water molecule (W1), hydroxyl and water (W1A and W1B) on the Ca-rich (100) facet of HAp

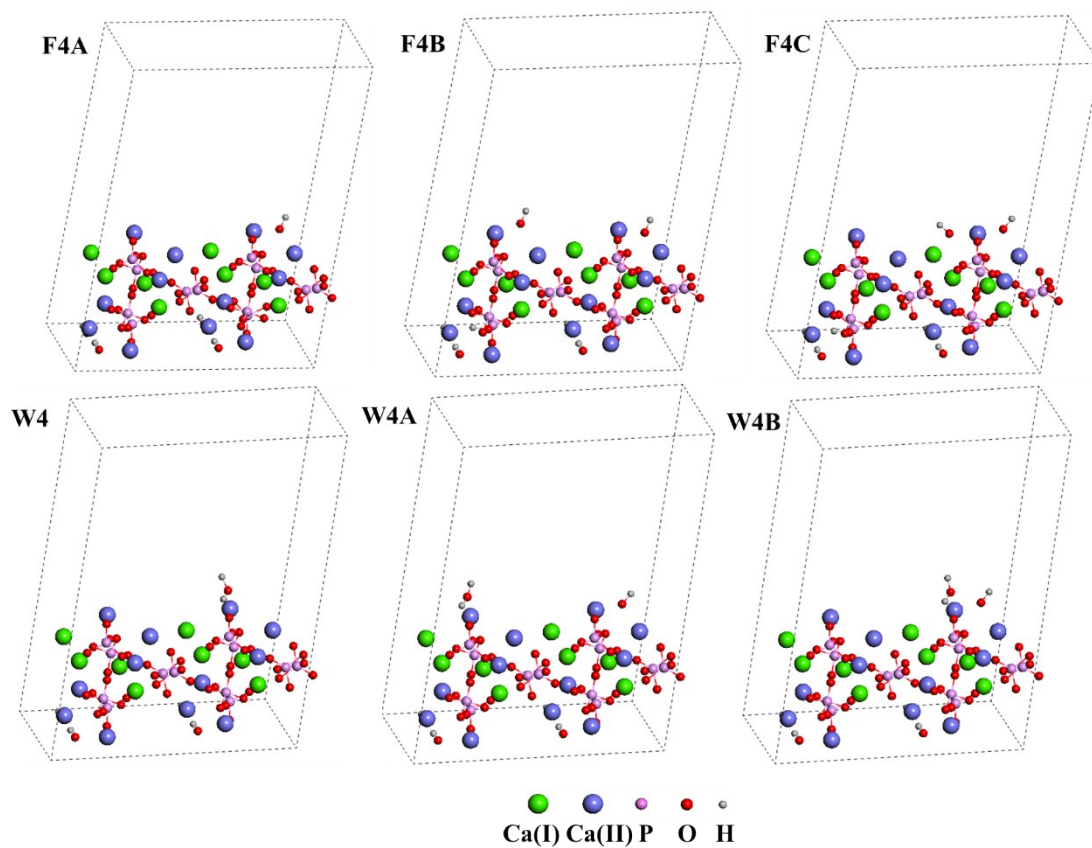

**Fig. S2** Interaction patterns of hydroxyls (F4A, F4B and F4C), water molecule (W4), hydroxyl and water (W4A and W4B) on the Ca-rich (010) facet of HAp

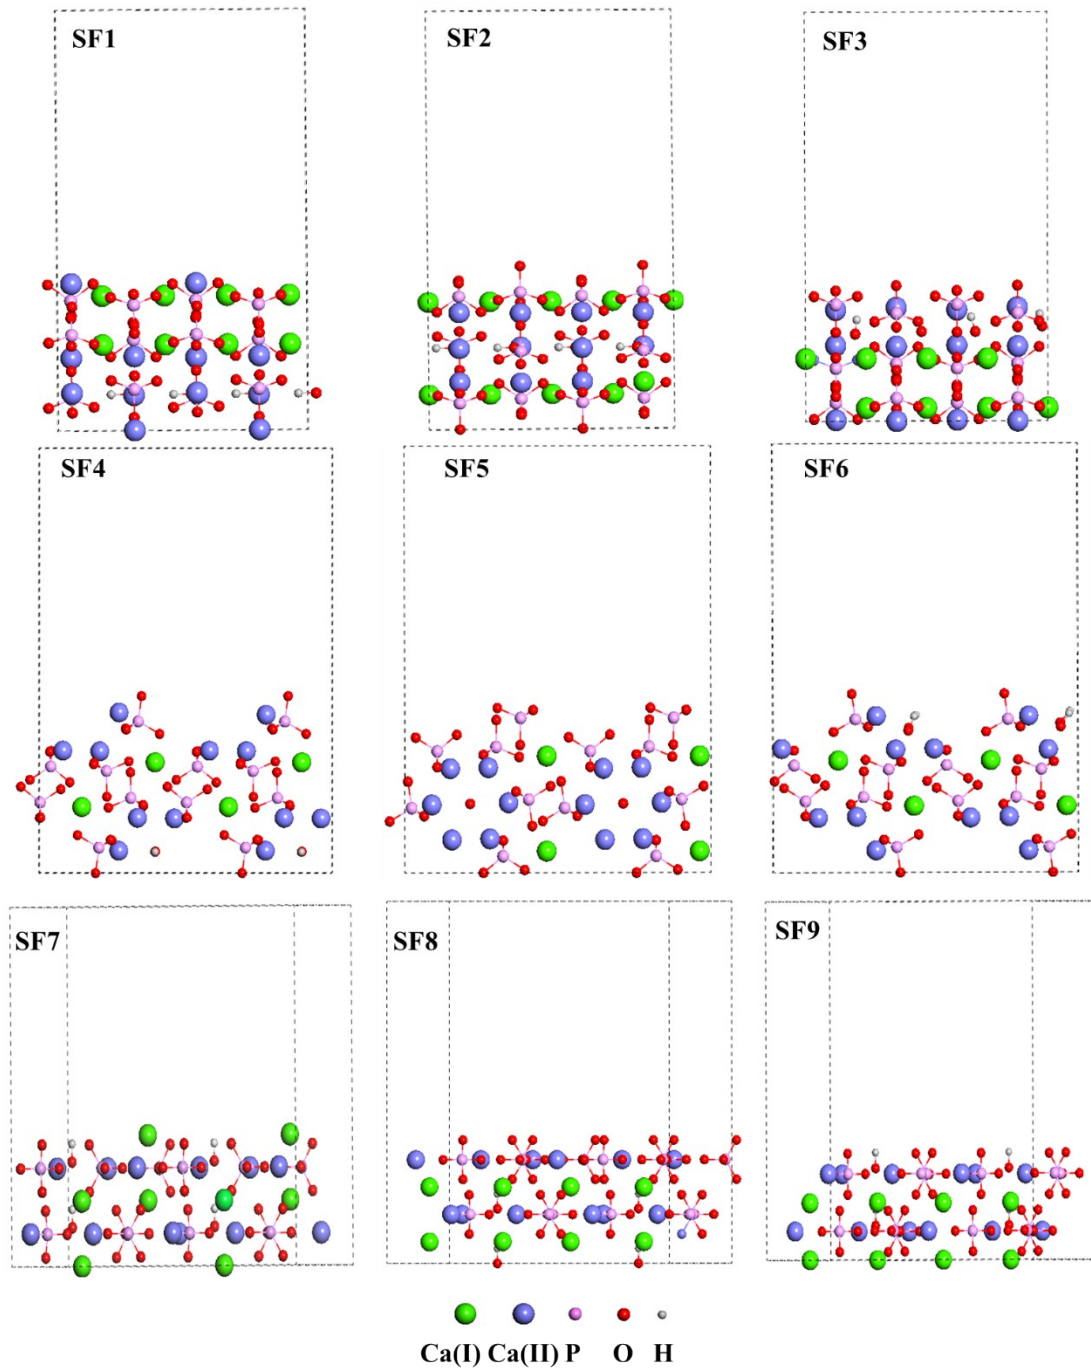

**Fig. S3** Surface structures of pure HAP. SF1, SF2 and SF3 are Ca-rich, PO<sub>4</sub>-rich and Ca-PO<sub>4</sub>-OH surfaces on the (100) facet, respectively. SF4, SF5 and SF6 are Ca-rich, PO<sub>4</sub>-rich and Ca-PO<sub>4</sub>-OH surfaces on the (010) facet, respectively. SF7, SF8 and SF9 are Ca-rich, PO<sub>4</sub>-rich and Ca-PO<sub>4</sub>-OH surfaces on the (001) facet, respectively
